# Supplementary material
Source: PubMed Central journal article supplement (PMC11113512)
Supplement: 18_2013_1367_MOESM1_ESM.pdf [file 18_2013_1367_MOESM1_ESM.pdf]

## Selective modulation of the Glucocorticoid Receptor can distinguish between transrepression of NF- $\kappa$ B and AP-1

Ilse M. Beck<sup>1,2,‡</sup>, Karolien De Bosscher<sup>1,3,‡,§</sup>, Lien Dejager<sup>4</sup>, Nadia Bougarne<sup>1,3</sup>, Anthoula Gaigneaux<sup>5</sup>, Sébastien Chateauvieux<sup>5</sup>, Dariusz Ratman<sup>3</sup>, Marc Bracke<sup>2</sup>, Jan Tavernier<sup>3</sup>, Wim Vanden Berghe<sup>1,6</sup>, Claude Libert<sup>4</sup>, Marc Diederich<sup>7</sup> and Guy Haegeman<sup>1,8,§</sup>.

<sup>1</sup>Laboratory of Eukaryotic Gene Expression & Signal Transduction (LEGEST), Department of Physiology, Ghent University, Belgium

<sup>2</sup>Laboratory of Experimental Cancer Research Department Radiation therapy & Experimental Cancer Research, Ghent University Hospital, Belgium

<sup>3</sup>Cytokine Receptor Lab, VIB Department of Medical Protein Research, Ghent University, Belgium

<sup>4</sup>Department for Molecular Biomedical Research, VIB, Ghent, Belgium and Department of Biomedical Molecular Biology, Ghent University, Ghent, Belgium

<sup>5</sup>Laboratoire de Biologie Moléculaire et Cellulaire du Cancer (LBMCC), Hôpital Kirchberg, Luxemburg, Luxemburg

<sup>6</sup>Lab Protein Chemistry, Proteomics & Epigenetic Signaling (PPES), Department Biomedical Sciences, University of Antwerp, Belgium

<sup>7</sup>Department of Pharmacy, College of Pharmacy, Seoul National University, Seoul 151-742, S. Korea

<sup>8</sup>present address: Division of Molecular Medicine, Department of Research and Development, Faculty of Medicine, Siriraj Hospital, Mahidol University, Bangkok 10700, Thailand

<sup>‡</sup> These authors contributed equally

<sup>§</sup> Correspondence to Karolien De Bosscher, Cytokine Receptor Lab, VIB Department of Medical Protein Research, VIB, UGent, Albert Baertsoenkaai 3, B-9000 Gent, Belgium; Tel +3292649363; Fax: +3226499490, e-mail: [Karolien.DeBosscher@vib-ugent.be](mailto:Karolien.DeBosscher@vib-ugent.be)

or Guy Haegeman, Department of Physiology, LEGEST, Proeftuinstraat 86 – INW – N1 first floor, B-9000 Gent, Belgium, Tel +3292645166, Fax +3292645304, e-mail: [Guy.Haegeman@ugent.be](mailto:Guy.Haegeman@ugent.be)

Running title: Selective transcription factor cross-talk by GR

# IMB&KDB\_Online Resource\_1

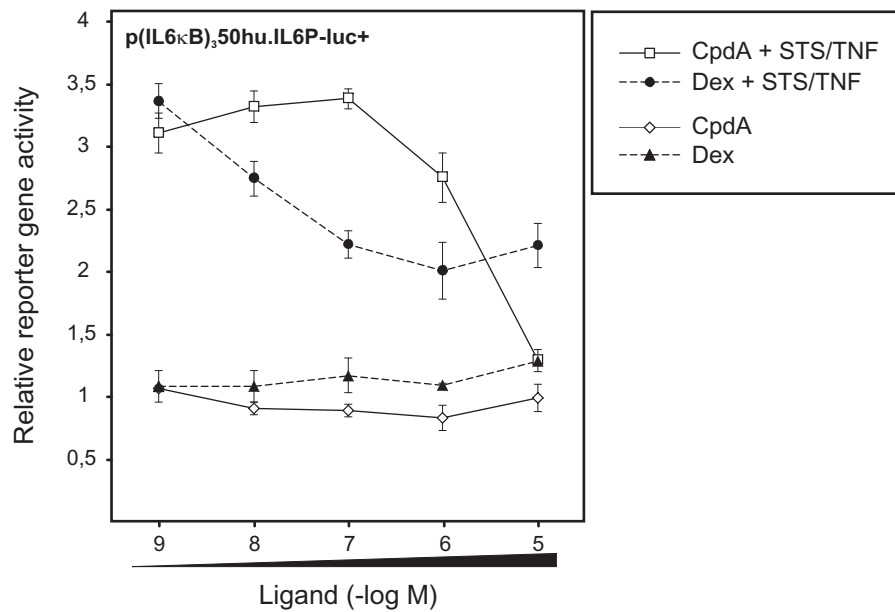

## Online Resource 1

### CpdA-mediated transrepression of the IL-6 gene promoter in fibroblast cells is only efficient in absence of a functional AP-1-response element

Subconfluent L929sA cell monolayers stably transfected with the p(IL6κB)<sub>3</sub>,50hu.IL6P-luc<sup>+</sup> reporter gene construct were grown in 24-well plates. Cells were pretreated for 1h, using DEX or CpdA with increasing concentrations, as indicated, followed by a treatment with solvent or TNF (2000IU/ml) and STS (60nM), for 5 h. At the end of the induction, cell lysates were assayed for reporter gene activities. Total solvent concentration was kept similar in all conditions. The experiments are carried out in triplicate. Results are shown +/-SD and are representative of three independent experiments.

## IMB&KDB\_Online Resource\_2

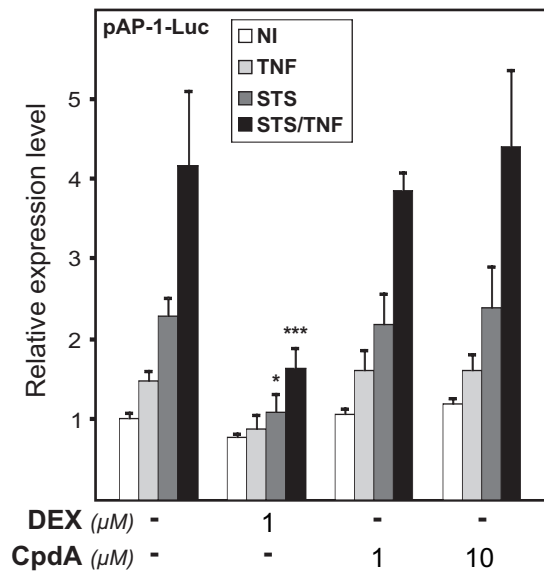

### Online Research 2

#### AP-1-driven gene transcription is downregulated by DEX but not by CpdA

Subconfluent L929sA cell monolayers, stably transfected with the pAP-1-Luc reporter gene construct, were untreated or treated with 2000IU/ml TNF, with 60nM STS, with 50ng/ml TPA or a combination hereof, for 5h, in the presence or not of DEX (1 $\mu$ M) or CpdA (1 or 10 $\mu$ M), starting at 1h. At the end of the induction, cell lysates were assayed for reporter gene activities. The experiment is carried out in triplicate. Results are shown +/-SD and are representative of at least two independent experiments. Total solvent concentration was kept similar in all conditions. \*p<0,05, \*\*\* p< 0,001. Comparisons were made versus the respective pro-inflammatory stimuli.

# IMB&KDB\_Online Resource\_3

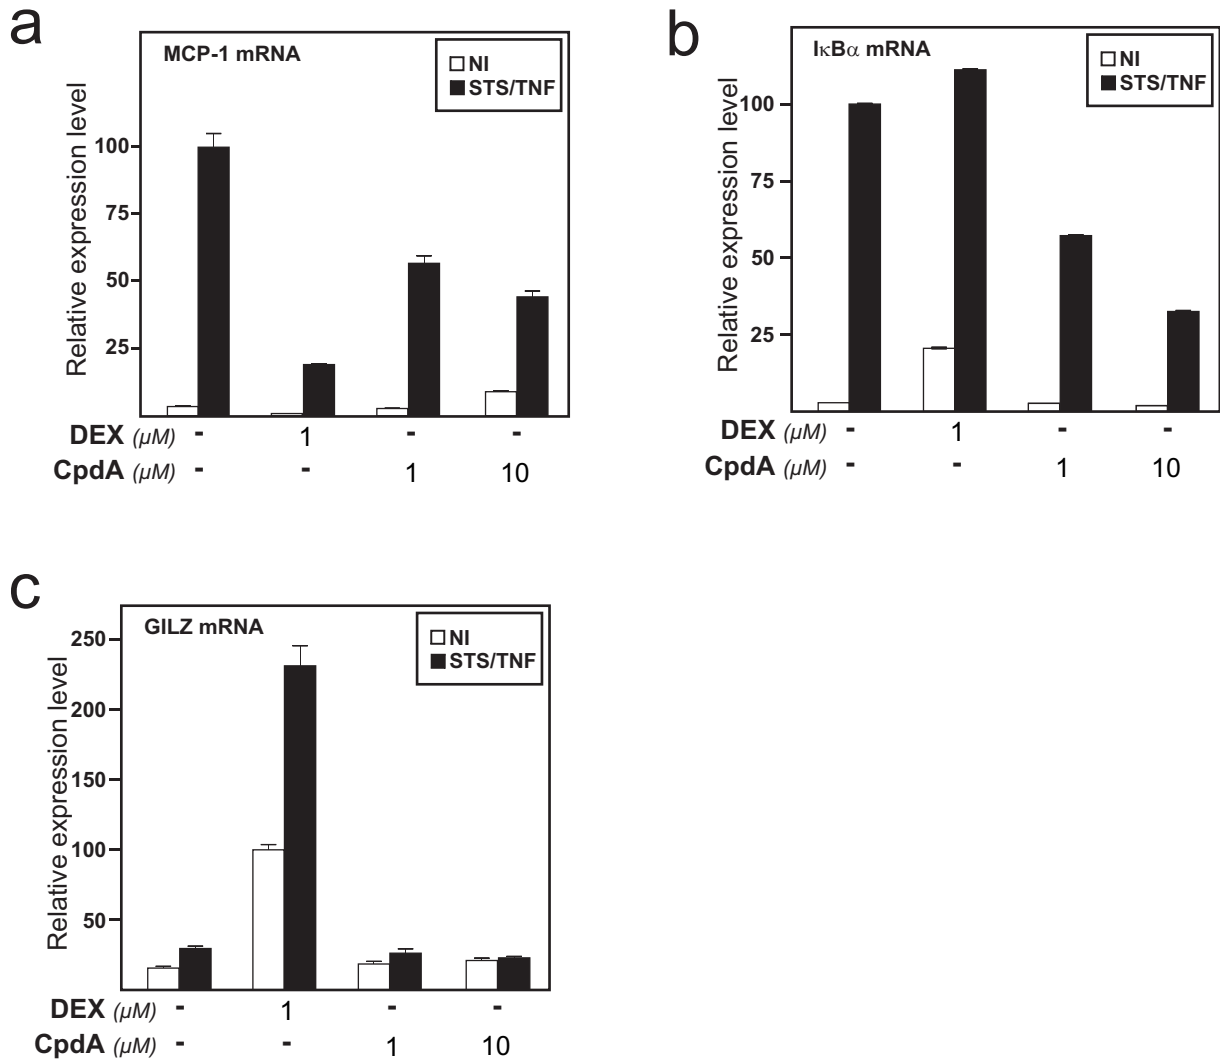

## Online Resource 3

### DEX and CpdA instigate differential effects, depending on the promoter context

L929sA cells, starved for 48h in DMEM devoid of serum, were pre-incubated with solvent, DEX (1 $\mu$ M), or CpdA (1 or 10 $\mu$ M) for 1h, before STS (60nM) and TNF (2000IU/ml) were added, where indicated, for 6h. Total RNA was isolated and subjected to RT-qPCR assaying the mRNA levels of MCP-1, I $\kappa$ B $\alpha$ , and GILZ and two household gene mRNA levels. Specific signal for cDNA of MCP-1 (a), I $\kappa$ B $\alpha$  (b), and GILZ (c) was normalized to the averaged household genes signal. The STS/TNF condition was set as 100 and all other conditions were recalculated accordingly to allow ratio comparisons. Total solvent concentration was kept similar in all conditions. Results are shown +/-SD. The experiment was carried out in triplicate, and the result is representative for at least two independent experiments.

# IMB&KDB\_Online Resource\_4

| 422 genes     |          |           |          |           |           |          |
|---------------|----------|-----------|----------|-----------|-----------|----------|
| TNF inducible |          |           |          |           |           |          |
| MARCH3        | C7orf49  | CXCR3     | GBP2     | JUN       | NINJ1     | PTP4A3   |
| ABTB2         | C8orf4   | CXCR4     | GBP3     | KIAA1217  | NKD2      | PTPN1    |
| ADAR          | C9orf30  | CXorf38   | GBP4     | KIAA1609  | NKX3-1    | PTX3     |
| ADORA2A       | CA8      | CYLD      | GCH1     | KIAA1949  | NOD2      | RAB9A    |
| ADRB2         | CAMK1G   | CYP26B1   | GFPT2    | KIF1B     | NPHS1     | RAB9BP1  |
| AKAP13        | CARD14   | CYP2C9    | GJB2     | KIRREL2   | NPTX1     | RAPH1    |
| AKAP2         | CARKD    | CYTH1     | GTF3C4   | KLF6      | NR4A1     | RARRES1  |
| AMPD3         | CASP10   | CYTH4     | HBEGF    | KREMEN2   | NR4A2     | RASGEF1A |
| ANK2          | CASP7    | DAPK2     | HCP5     | LAD1      | NR4A3     | RASSF5   |
| ANKRD33B      | CBFA2T3  | DCUN1D3   | HEPACAM2 | LAMB3     | NRG1      | RCAN1    |
| APOL2         | CBR3     | DDX10     | HINT3    | LAMC2     | NUAK2     | RELA     |
| APOL3         | CCDC130  | DENND2D   | HIVEP1   | LIF       | NUB1      | RELB     |
| APOL4         | CCL17    | DENND5A   | HIVEP2   | LOC284570 | NUP153    | RELT     |
| APOL6         | CCL2     | DRAM1     | HLA-A    | LOC286359 | OLR1      | REPIN1   |
| ASS1          | CCL20    | DTX3L     | HLA-C    | LOC440934 | OSGIN2    | RFFL     |
| ATF3          | CCL4     | DUSP10    | HLA-F    | LOC646626 | OVOS2     | RFTN1    |
| B2M           | CCL5     | DUSP16    | HLA-J    | LOC728743 | P4HA2     | RFX2     |
| B4GALT1       | CCRN4L   | DUSP5     | HNRNPC   | LOC80154  | PARP8     | RHCG     |
| BAHCC1        | CD274    | DUSP5P    | HS3ST1   | LRIG1     | PBX4      | RHOG     |
| BAMBI         | CD40     | DUSP6     | ICAM1    | LRRC32    | PDE4B     | RIPK2    |
| BATF3         | CD83     | DUSP8     | ICAM4    | LTB       | PDE9A     | RND1     |
| BBC3          | CDC42EP2 | EBI3      | ICAM5    | MAFF      | PDGFB     | RNF144B  |
| BCL2A1        | CDC42EP4 | EFNA1     | IDO1     | MAMLD1    | PFKFB4    | RNF24    |
| BCL2L11       | CEBPB    | EFNA3     | IFIT2    | MAP2K3    | PHC2      | RRAD     |
| BCL3          | CEBPD    | EFNB1     | IFIT3    | MCL1      | PHF15     | RTP4     |
| BCL9L         | CELF1    | EGFR      | IFNAR2   | MESDC1    | PIF1      | S100A3   |
| BDKRB1        | CFB      | EHD1      | IFNGR2   | MFHAS1    | PIM1      | SAMD4A   |
| BDKRB2        | CFLAR    | EIF2C2    | IKBKE    | MICAL2    | PIM3      | SAT1     |
| BHLHE41       | CH25H    | ENGASE    | IL10RB   | MICB      | PISD      | SDC4     |
| BID           | CHST2    | EREG      | IL15     | MMP19     | PLAT      | SELE     |
| BIK           | CIDECP   | ETS1      | IL15RA   | MOBKL2C   | PLAU      | SEMA4C   |
| BIRC3         | CITED4   | ETV6      | IL1A     | MREG      | PLAUR     | SERPINA3 |
| BPGM          | CLDN1    | EXT1      | IL1B     | MSC       | PLEKHA4   | SERPINB8 |
| BTG3          | CLDN5    | FAM110A   | IL23A    | MSX1      | PLEKHG2   | SERPINB9 |
| BTN2A1        | CLEC2D   | FAM129A   | IL27RA   | MYBPC1    | PLEKHG3   | SFTPC    |
| BTN2A2        | CLEC4E   | FBLN5     | IL32     | MYEOV     | PLK2      | SH2B3    |
| BTN2A3        | CLIC4    | FGF18     | IL3RA    | N4BP3     | PML       | SH2D1B   |
| C10orf10      | CLIP2    | FJX1      | IL411    | NAB1      | PNMA2     | SH3PXD2A |
| C11orf68      | CREB3L3  | FLJ36031  | IL4R     | NACC1     | PNRC1     | SHB      |
| C12orf34      | CSF1     | FOSB      | IL6      | NAV3      | POM121L9P | SLA2     |
| C15orf37      | CSF2     | FOSL1     | IL7R     | NCOA7     | POU5F1    | SLC12A7  |
| C15orf48      | CSF3     | FOSL2     | IL8      | NEDD4L    | PPAP2B    | SLC25A28 |
| C1QTNF1       | CTNNB1   | FOXO1     | INHBA    | NEURL3    | PPARD     | SLC25A37 |
| C20orf54      | CTSC     | FSTL3     | IRAK2    | NFIL3     | PPIF      | SLC26A9  |
| C21orf121     | CX3CL1   | FZD9      | IRF1     | NFKB1     | PPP1R15B  | SLC2A6   |
| C3            | CXCL1    | GOS2      | ISG20    | NFKB2     | PRDM1     | SLC31A2  |
| C3orf52       | CXCL10   | GABARAPL1 | ITGA5    | NFKBIA    | PRR5      | SLC37A1  |
| C3orf59       | CXCL2    | GABPB1    | ITPKC    | NFKBIB    | PSMA6     | SLC6A12  |
| C5orf56       | CXCL3    | GATA6     | JAG1     | NFKBID    | PTAFR     | SLFN5    |
| C6orf150      | CXCL6    | GBP1      | JAK2     | NFKBIE    | PTGS2     | SLPI     |

## Online Resource 4

### Whole genome transcriptome analysis of A549 cells in response to TNF, DEX and/or CpdA

A549 cells, starved in 0% DMEM for 24h, were pretreated for 1h either with DEX (1 $\mu$ M) or CpdA (10 $\mu$ M), either or not followed by 3h treatment with TNF (2000IU/ml). Gene expression levels of corresponding RNA samples were evaluated by an Agilent array. Genes with adjusted p-values lower than 0.05 in at least one contrast and a foldchange higher than 1.3 were selected as significant.

Of 422 TNF inducible genes, 179 genes were repressed by DEX, of which 121 genes were exclusively repressed by DEX but not CpdA and 58 were repressed by both CpdA and DEX.

# IMB&KDB\_Online Resource\_4\_continued

| TNF inducible, continued |         | 121 genes<br>TNF+DEX repressed |          |           | 50 genes<br>TNF+CpdA repressed | 58 genes<br>TNF+DEX+CpdA repressed |          |
|--------------------------|---------|--------------------------------|----------|-----------|--------------------------------|------------------------------------|----------|
| SMAD3                    | UBD     | ADAR                           | HBEGF    | SLFN5     | ADORA2A                        | ANK2                               | SPEN     |
| SMG1                     | UBE2H   | APOL3                          | HINT3    | SMAD3     | ASS1                           | BAHCC1                             | SRCIN1   |
| SMOX                     | UNC5B   | APOL6                          | HIVEP1   | SSH1      | BCL9L                          | BPGM                               | TBC1D10A |
| SMURF1                   | UNKL    | ATF3                           | HNRNPC   | STYK1     | C12orf34                       | C20orf54                           | TNF      |
| SMURF2                   | USP31   | B2M                            | IDO1     | TIAM2     | C1QTNF1                        | CCL2                               | TNFAIP6  |
| SNAPC4                   | USP42   | BBC3                           | IFIT2    | TIFA      | C3                             | CCL5                               | TRAF1    |
| SOCS1                    | USP43   | BCL2A1                         | IL15RA   | TMEM158   | C7orf49                        | CD83                               | USP43    |
| SOD2                     | VCAM1   | BCL2L11                        | IL23A    | TNFRSF10B | CAMK1G                         | CLIP2                              | VCAM1    |
| SOX9                     | VDR     | BCL3                           | IL4I1    | TNFRSF9   | CBFA2T3                        | CX3CL1                             |          |
| SP100                    | VEGFC   | BDKRB1                         | IL6      | TP63      | CCL17                          | DUSP10                             |          |
| SPEN                     | WTAP    | BDKRB2                         | IL8      | TRIML2    | CD40                           | EXT1                               |          |
| SPRY4                    | XBP1    | BHLHE41                        | ISG20    | UBD       | CEBPD                          | FOSL1                              |          |
| SRCIN1                   | YWHAG   | C11orf68                       | JAG1     | UBE2H     | CFB                            | G0S2                               |          |
| SRSF12                   | ZBTB46  | C15orf48                       | JUN      | UNKL      | CREB3L3                        | GBP4                               |          |
| SSH1                     | ZBTB7A  | C5orf56                        | KIAA1217 | USP42     | CSF3                           | HEPACAM2                           |          |
| SSTR2                    | ZC3H12A | C6orf150                       | LAMB3    | VDR       | EBI3                           | IFIT3                              |          |
| ST3GAL4                  | ZFP36   | C8orf4                         | LIF      | VEGFC     | FGF18                          | IL1A                               |          |
| STAT5A                   | ZKSCAN1 | CASP10                         | MAMLD1   | YWHAG     | FSTL3                          | IL1B                               |          |
| STX11                    | ZNF101  | CASP7                          | MAP2K3   | ZKSCAN1   | FZD9                           | IL3RA                              |          |
| STYK1                    | ZNF641  | CBR3                           | MFHAS1   | ZNF641    | HLA-F                          | JAK2                               |          |
| TAP1                     | ZNF697  | CCRN4L                         | NAB1     | ZNF697    | HLA-J                          | KIF1B                              |          |
| TAPBP                    | ZNFX1   | CD274                          | NAV3     |           | ICAM1                          | KIRREL2                            |          |
| TBC1D10A                 |         | CELF1                          | NCOA7    |           | IFNAR2                         | LOC286359                          |          |
| TBC1D2B                  |         | CHST2                          | NEURL3   |           | IFNGR2                         | LRRC32                             |          |
| TFF1                     |         | CITED4                         | NFKB1    |           | IKBKE                          | LTB                                |          |
| THSD1                    |         | CLDN1                          | NR4A1    |           | IL32                           | MSC                                |          |
| TIAM2                    |         | CLEC2D                         | NR4A2    |           | IRF1                           | MYBPC1                             |          |
| TIFA                     |         | CSF2                           | NR4A3    |           | ITGA5                          | NFKB2                              |          |
| TMEM158                  |         | CTSC                           | NRG1     |           | KIAA1949                       | NKX3-1                             |          |
| TMEM88                   |         | CXCL1                          | OSGIN2   |           | LOC728743                      | NPHS1                              |          |
| TNF                      |         | CXCL3                          | OVOS2    |           | MYEOV                          | OLR1                               |          |
| TNFAIP1                  |         | CXCL6                          | PDGFB    |           | NINJ1                          | PDE4B                              |          |
| TNFAIP2                  |         | CXCR4                          | PIM1     |           | NOD2                           | PIF1                               |          |
| TNFAIP3                  |         | CXorf38                        | PLAU     |           | PDE9A                          | PLAT                               |          |
| TNFAIP6                  |         | CYP26B1                        | PLEKHA4  |           | PISD                           | PLAUR                              |          |
| TNFRSF10B                |         | DDX10                          | PLK2     |           | PTP4A3                         | PNMA2                              |          |
| TNFRSF9                  |         | DENND5A                        | PPARD    |           | RELA                           | PPP1R15B                           |          |
| TNFSF14                  |         | DTX3L                          | PPIF     |           | RHOG                           | PTAFR                              |          |
| TNIP1                    |         | DUSP16                         | PRR5     |           | RRAD                           | RASSF5                             |          |
| TP63                     |         | DUSP6                          | PTGS2    |           | SERPINA3                       | RTP4                               |          |
| TRAF1                    |         | DUSP8                          | PTX3     |           | SLC2A6                         | SDC4                               |          |
| TRAF2                    |         | EFNA1                          | RFFL     |           | SPRY4                          | SH2B3                              |          |
| TRAF3                    |         | EHD1                           | RFX2     |           | SSTR2                          | SH3PXD2A                           |          |
| TRIM47                   |         | EREG                           | RIPK2    |           | STAT5A                         | SHB                                |          |
| TRIM56                   |         | ETV6                           | RND1     |           | TNFAIP2                        | SLA2                               |          |
| TRIM8                    |         | FAM129A                        | SERPINB8 |           | TNIP1                          | SLC6A12                            |          |
| TRIML2                   |         | FOSB                           | SERPINB9 |           | TRIM47                         | SMG1                               |          |
| TUBB2A                   |         | GBP1                           | SFTPC    |           | UNC5B                          | SMOX                               |          |
| TUBB2B                   |         | GBP2                           | SLC12A7  |           | ZBTB7A                         | SMURF2                             |          |
| TYK2                     |         | GBP3                           | SLC25A37 |           | ZNFX1                          | SOX9                               |          |

## Online Resource 4

### Whole genome transcriptome analysis of A549 cells in response to TNF, DEX and/or CpdA

A549 cells, starved in 0% DMEM for 24h, were pretreated for 1h either with DEX (1 $\mu$ M) or CpdA (10 $\mu$ M), either or not followed by 3h treatment with TNF (2000IU/ml). Gene expression levels of corresponding RNA samples were evaluated by an Agilent array. Genes with adjusted p-values lower than 0.05 in at least one contrast and a foldchange higher than 1.3 were selected as significant.

Of 422 TNF inducible genes, 179 genes were repressed by DEX, of which 121 genes were exclusively repressed by DEX but not CpdA and 58 were repressed by both CpdA and DEX.

# IMB&KDB\_Online Resource\_5

**a**

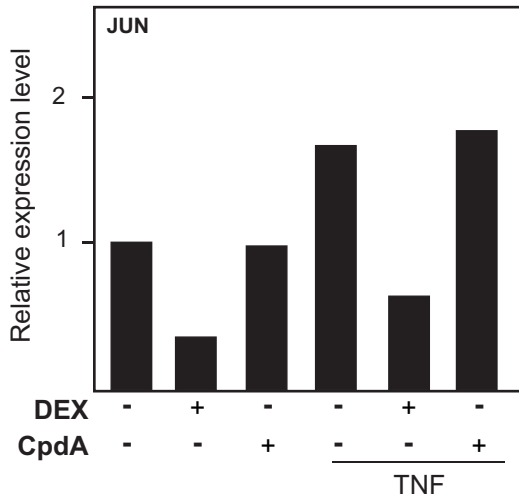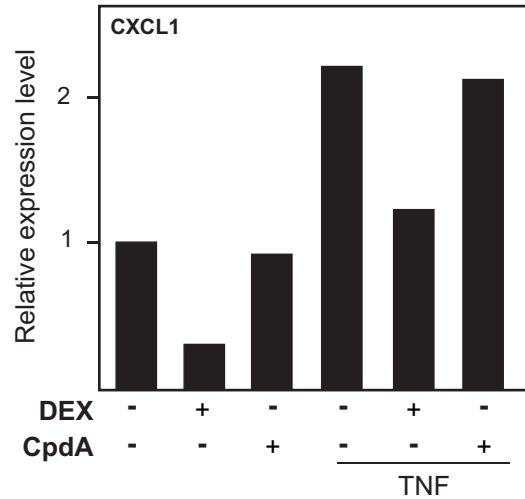

**b**

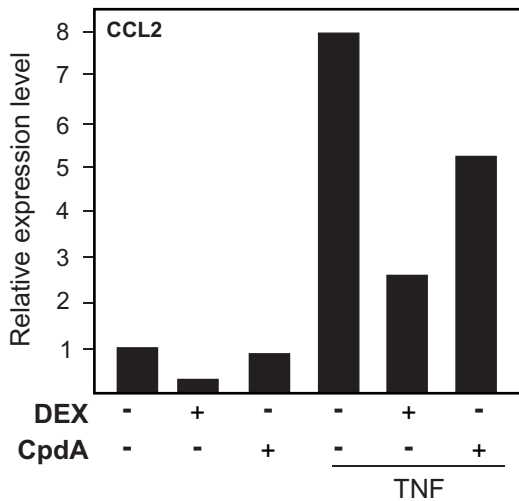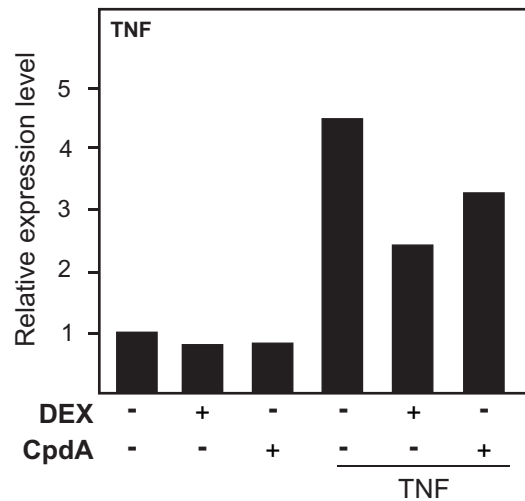

**c**

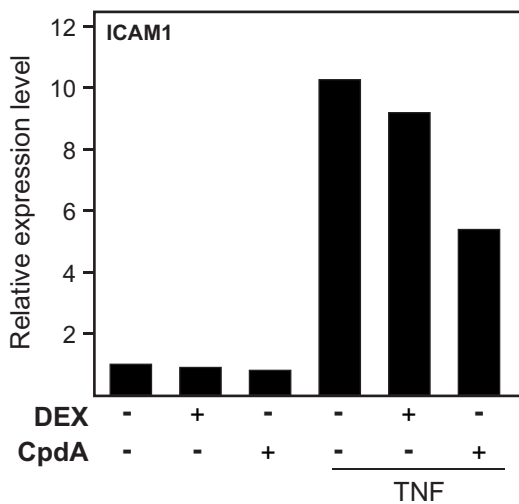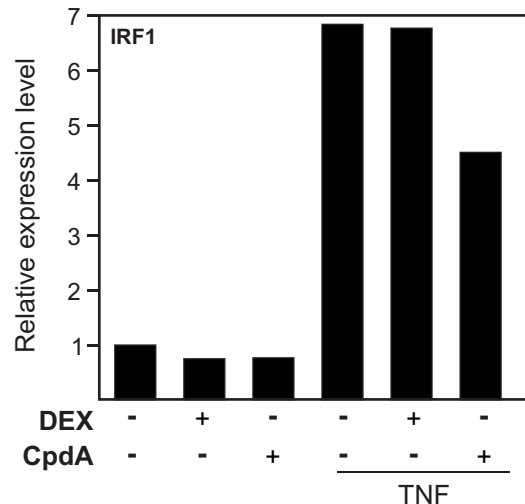

*Online Resource 5*

**Whole genome transcriptome analysis of A549 cells in response to TNF, DEX and/or CpdA**

A549 cells, starved in 0% DMEM for 24h, were pretreated for 1h either with DEX (1 $\mu$ M) or CpdA (10 $\mu$ M), either or not followed by 3h treatment with TNF (2000IU/ml). Gene expression levels of corresponding RNA samples were evaluated by an Agilent array. Genes with adjusted p-values lower than 0.05 in at least one contrast and a foldchange higher than 1.3 were selected as significant.

Gene expression profiles of select targets are exemplarily displayed. (a) Selected gene expression responses repressed by DEX, but not or to a lesser extent by CpdA. (b) Selected gene expression responses repressed by both DEX and CpdA. (c) Selected gene expression responses repressed by CpdA, but not or to a lesser extent by DEX.

# IMB&KDB\_Online Resource\_6

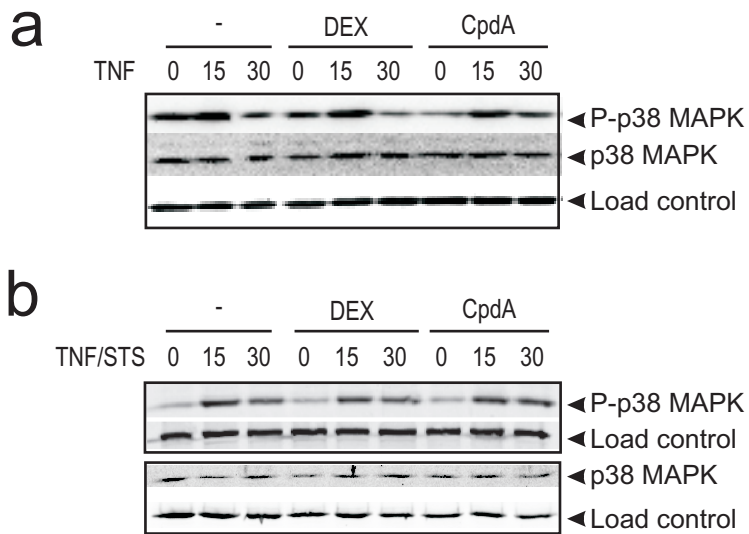

## Online Resource 6

### DEX nor CpdA affect p38 MAPK phosphorylation, irrespective of the stimulus

(a) and (b) L929sA cells, starved for 48h in DMEM devoid of serum, were pretreated with solvent, 1 $\mu$ M DEX, or 10 $\mu$ M CpdA for 1h, followed by either or not TNF (2000IU/ml) (panel a), or TNF combined with STS (60nM) (panel b), for the indicated time points (in minutes). Cell lysates were made and activated p38 MAPK was detected using the phospho-specific p38 MAPK antibody.

Aspecific bands, non-phosphorylated proteins and/or NF- $\kappa$ B p65 served as a loading control (indicated as Load control).



# IMB&KDB\_Online Resource\_7

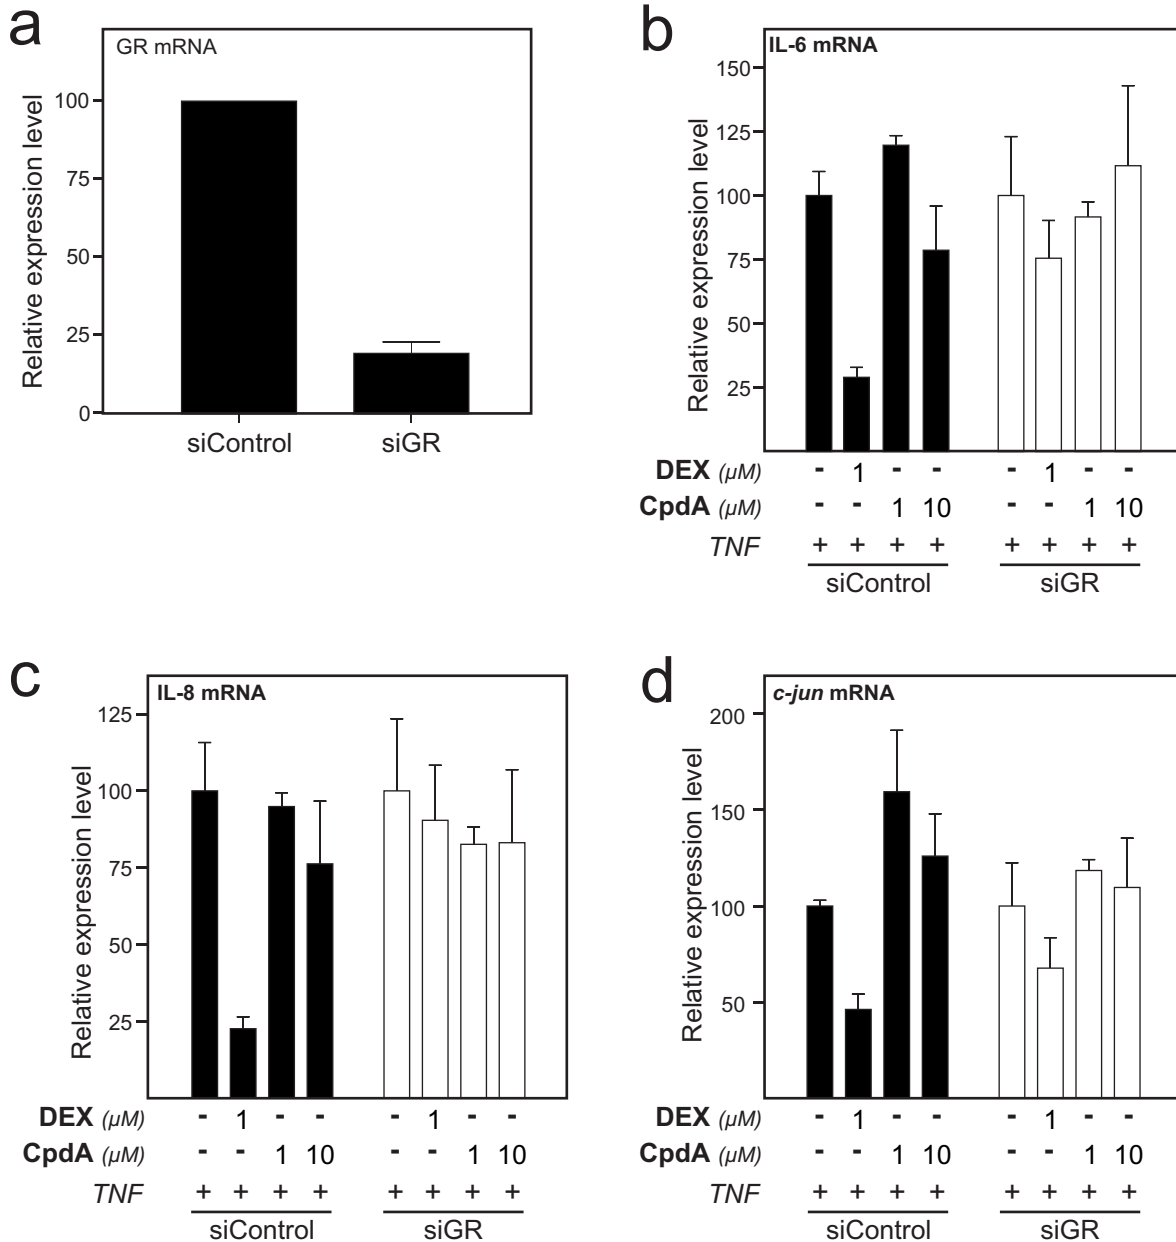

## Online Resource 7

### GR is essential to mediate the effect of DEX and CpdA on gene expression in A549 cells

A549 cells were transfected with siRNA control (siControl) or siRNA targeted at GR (siGR) and were allowed to rest for 24h. Subsequently, cells were pre-incubated with solvent, DEX (1 $\mu$ M), or CpdA (1 or 10 $\mu$ M) for 1h, before TNF (2000IU/ml) was added for 24h. Total RNA was isolated and subjected to RT-qPCR for specific target genes, and expression levels in each treatment group were normalized to the values in the TNF-stimulated samples. In (a), the expression levels for GR (siControl) were set at 100 and the siGR condition was recalculated accordingly. Normalized mRNA levels for IL-6 (b), IL-8 (c) and c-Jun (d) was presented as induction fold with the solvent condition of both siControl and siGR set as 100. Total solvent concentration was kept similar in all conditions. Results are shown +/-SD. The experiment was carried out in duplicate.
